# Supplementary material for: ScaFi: Length-Scalable, Compliant, Parametric Robotic Fish Design for Operation in Multiple Environmental Niches
Source: Research Square preprint supplement (doi:10.21203/rs.3.rs-7577054/v1), 2025-10-10
Supplement: Supplementary file 1 [file ae5c8d54e010a035d04d60ae.pdf]

# Supplementary Materials for “ScaFi: Length-Scalable, Compliant, Parametric Robotic Fish Design for Operation in Multiple Environmental Niches”

Nana Obayashi, Alexandros Anastasiadis, Jessica Gumowski, Kai Junge, Kyle L. Walker, Karen Mulleners, & Josie Hughes

## Supplementary Figures

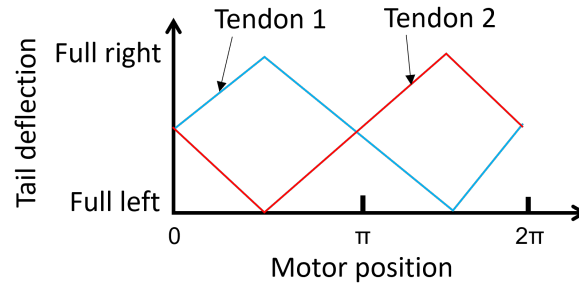

**Figure S1.** Relationship between the two tendons of the robot and the tail effects. Tendon colors and motor position correspond to those in Fig. 2A,C.

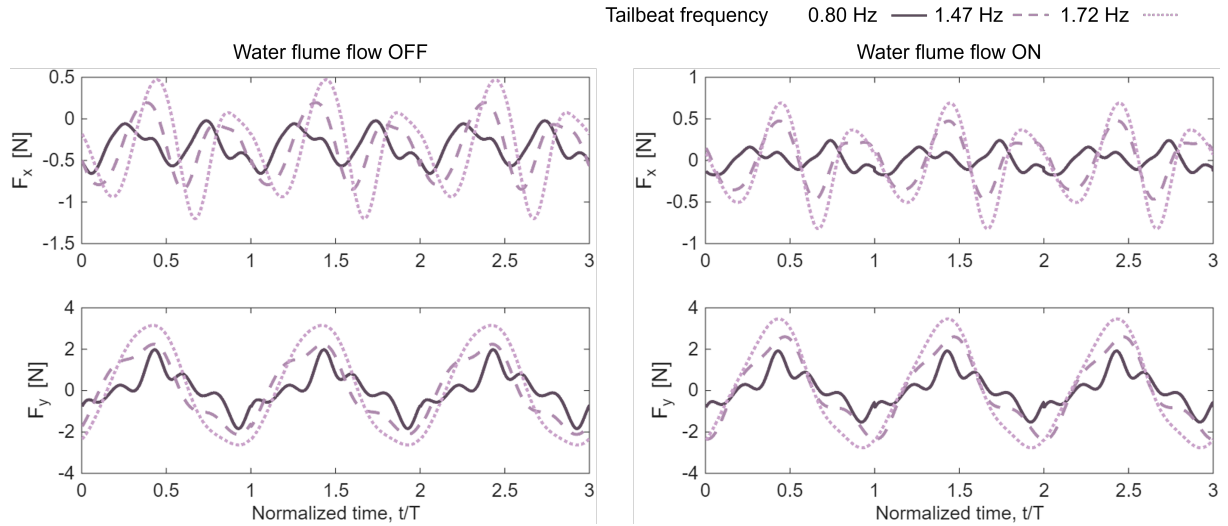

**Figure S2.** In the PIV experiments where results are shown in Fig. 3, this supplementary figure shows the forces obtained during the experiment where the water flume flow is OFF and ON for three different tailbeat frequencies. Direction X corresponds to the flow direction which is opposite to the direction of forward robot movement if the robot were not statically attached to the rig.

## Supplementary Videos

**Supplementary Videos 1 and 2** show the robot swimming experiments performed in the paddling pool for gathering velocity and efficiency data for the robot sizes  $L = 0.6$  m and  $L = 1.1$  m,

respectively.

**Supplementary Video 3** shows the robot swimming experiments performed in the EPFL Laboratoire de Machines hydrauliques which accommodated the size and depth required to test the robot of the largest length scale at  $L = 2.9$  m.

**Supplementary Videos 4 and 5** show the real-world deployment experiments for multiple scales of the robot.
